# Supplementary material for: Heart rate is associated with progression of atrial fibrillation, independent of rhythm
Source: HighWire-hosted journal article supplement (doi:10.1136/heartjnl-2014-307043), 2015-03-02
Supplement: heartjnl-2014-307043supp.pdf [file heartjnl-2014-307043supp.pdf]

## **APPENDIX**

### **Candidate covariates**

#### Demographics

1. Age, years
2. Race – African American/Hispanic/White/Others
3. Gender – Male/Female
4. Level of Education – Some School/High School Graduate/College Graduate/Post Graduate
5. Payer/Insurance – Medicare or Medicaid/private/Others

#### Medical History

1. Smoking – Current/Recent or Former/Non-smoker
2. Cancer – Yes/No
3. Hypertension – Yes/No
4. Osteoporosis – Yes/No
5. Diabetes – Yes/No
6. Hip Fracture – Yes/No
7. Hyperthyroidism – Yes/No
8. Hypothyroidism – Yes/No
9. GI Bleed – Yes/No
10. Obstructive Sleep Apnea – Yes/No
11. Dialysis – Yes/No
12. Hyperlipidemia – Yes/No
13. Anemia – Yes/No
14. Cognitive Impairment/Dementia – Yes/No
15. Frailty – Yes/No
16. Liver Disease – Yes/No
17. COPD – Yes/No
18. Alcohol Abuse – Yes/No
19. Drug Abuse – Yes/No

#### Cardiovascular History

1. Family History of AF – Yes/No

2. Peripheral Vascular Disease – Yes/No
3. Sinus Node Dysfunction/Sick Sinus Syndrome – Yes/No
4. Stroke or TIA – Yes/No
5. Congestive Heart Failure (CHF) – No CHF/NYHA Class I/NYHA Class II/NYHA Class III or NYHA Class IV
6. Significant Valvular Disease – Yes/No
7. Prior Valve Replacement/Repair – Yes/No

#### Coronary Artery Disease History

1. History of Coronary Artery Disease – Yes/No
2. Prior MI – Yes/No
3. Prior CABG – Yes/No
4. Any PCI – Yes/No

#### Vital Signs & AF status

1. Height, cm
2. Weight, kg
3. Heart Rate, bpm
4. Diastolic Blood Pressure, mmHG
5. Systolic Blood Pressure, mmHG
6. Body Mass Index, kg/m<sup>2</sup>
7. Intraventricular Conduction – RBBB/LBBB/Non-specific IVCD or Unknown-Ventricularly Paced/none

#### Echocardiographic Assessment (TTE or TEE)

1. LVEF – Normal ( $\geq 50\%$ )/Mild dysfunction ( $>40\%$ ,  $<50\%$ )/Moderate dysfunction ( $\geq 30\%$ ,  $\leq 40\%$ )/Severe dysfunction ( $<30\%$ )
2. LAD Type – Normal/Mild enlargement/Moderate enlargement/Severe enlargement

#### Laboratory Data

1. eGFR (MDRD), mg/dl

2. Hemotocrit, %
3. Atrial Fibrillation or Atrial Flutter in the most recent 12 Lead EKG – Yes/No

#### Atrial Fibrillation Diagnosis

1. EHRA Score – No symptoms/Mild/Severe/Disabling
2. AF management strategy – Rate Control/Rhythm Control
3. Prior Cardioversions – Yes/No
4. Prior antiarrhythmic drug – Yes/No
5. Catheter Ablation of AF – Yes/No

#### Functional Status

1. Functional Status – Living independently/Living with assistance or Resides in assisted living facility or Resides in skilled nursing home or Bedbound

#### Provider or Site

1. PI/Site Specialty – Cardiology/Electrophysiology/Family Practice or Internal Medicine

*Table - Predictors of AF progression, including treatment variables*

| <b>Risk Factor</b>                                                  | <b>Adjusted OR (95% CI)</b> | <b>tValue</b> | <b>P</b>          |
|---------------------------------------------------------------------|-----------------------------|---------------|-------------------|
| Atrial Fibrillation or Atrial Flutter on baseline electrocardiogram | 2.35 (1.99,2.78)            | 10.10         | <b>&lt;0.0001</b> |
| Heart Rate ≤ 80, bpm (per 10 decrease)                              | 0.85 (0.80,0.89)            | 5.61          | <b>&lt;0.0001</b> |
| NYHA Class III/IV vs. No heart failure                              | 1.59 (1.26,2.01)            | 3.91          | <b>&lt;0.0001</b> |
| Age, years (per 10 increase)                                        | 1.13 (1.06,1.20)            | 3.80          | <b>0.0001</b>     |
| NYHA Class II vs. No heart failure                                  | 1.38 (1.15,1.65)            | 3.53          | <b>0.0004</b>     |
| Moderate left atrial enlargement vs. No enlargement                 | 1.35 (1.14,1.60)            | 3.47          | <b>0.0005</b>     |
| Prior Cardioversions                                                | 1.26 (1.10,1.44)            | 3.28          | <b>0.0010</b>     |
| African American vs. White                                          | 0.59 (0.43,0.82)            | -3.18         | <b>0.0015</b>     |
| Mild left atrial enlargement vs. No enlargement                     | 1.24 (1.08,1.44)            | 2.97          | <b>0.0031</b>     |
| Severe left atrial enlargement vs. No enlargement                   | 1.33 (1.09,1.62)            | 2.78          | <b>0.0061</b>     |
| NYHA Class I vs. No heart failure                                   | 1.23 (1.03,1.49)            | 2.23          | <b>0.0256</b>     |
| Sinus Node Dysfunction/Sick Sinus Syndrome                          | 1.24 (1.01,1.50)            | 2.11          | <b>0.0352</b>     |
| Anemia                                                              | 0.82 (0.68,0.99)            | -2.08         | <b>0.0374</b>     |
| Persistent AF vs. Paroxysmal AF                                     | 0.94 (0.73,1.21)            | -0.49         | 0.6229            |
| Hispanic vs. White                                                  | 1.07 (0.49,2.31)            | 0.17          | 0.8649            |
| Other race vs. White                                                | 0.97 (0.59,1.58)            | -0.13         | 0.8977            |

\*Significant interaction between risk factor and baseline AF type. Odds ratio (OR) and 95%

CI are attained by combining results from the 5 imputed data sets.

AF = atrial fibrillation; BPM = beats per minute; CI=confidence interval; NYHA = New York Heart Association.
